# Supplementary material for: Identification and validation of soluble carrier family expression signature for predicting poor outcome of renal cell carcinoma
Source: PubMed Central journal article supplement — J Cancer. 2017 Jul 5;8(11):2010–7. doi: 10.7150/jca.18257 (PMC5559962; doi:10.7150/jca.18257), 2017-07-05
Supplement: jcav08p2010s1.pdf [file jcav08p2010s1.pdf]

Supplementary table 1. Univariate Cox hazard ratio regression model of clinical parameters and soluble carrier super family expression in TCGA ccRCC cohort

| Parameters | Univariate |                |              |
|------------|------------|----------------|--------------|
|            | HR         | 95%CI          | P.Value*     |
| Age        | 1.029      | 1.015 to 1.042 | <b>0.000</b> |
| Sex        | 0.932      | 0.679 to 1.281 | 0.666        |
| Stage      | 1.944      | 1.695 to 2.229 | <b>0.000</b> |
| Grade      | 2.399      | 1.941 to 2.965 | <b>0.000</b> |
| Hb         | 1.083      | 0.923 to 1.270 | 0.328        |
| WBC        | 1.243      | 1.088 to 1.420 | <b>0.001</b> |
| PLT        | 0.990      | 0.871 to 1.26  | 0.879        |
| Tumor size | 1.174      | 0.946 to 1.459 | 0.146        |
| Laterality | 0.669      | 0.491 to 0.913 | <b>0.011</b> |
| T          | 1.964      | 1.658 to 2.325 | <b>0.000</b> |
| N          | 0.879      | 0.752 to 1.028 | 0.106        |
| M          | 2.436      | 1.904 to 3.115 | <b>0.000</b> |
| Necrosis   | 2.692      | 1.885 to 3.844 | <b>0.000</b> |
| SLC1A1     | 0.704      | 0.640 to 0.774 | <b>0.000</b> |
| SLC1A2     | 1.028      | 0.899 to 1.176 | 0.683        |
| SLC1A3     | 0.911      | 0.803 to 1.034 | 0.148        |
| SLC1A4     | 0.705      | 0.535 to 0.930 | <b>0.013</b> |
| SLC1A5     | 1.831      | 1.465 to 2.287 | <b>0.000</b> |
| SLC1A6     | 0.999      | 0.914 to 1.092 | 0.984        |
| SLC1A7     | 1.002      | 0.923 to 1.087 | 0.966        |
| SLC2A1     | 1.188      | 0.996 to 1.417 | 0.055        |
| SLC2A10    | 1.063      | 0.920 to 1.227 | 0.409        |
| SLC2A11    | 0.817      | 0.636 to 1.051 | 0.116        |
| SLC2A12    | 1.180      | 0.988 to 1.410 | 0.068        |
| SLC2A13    | 0.693      | 0.567 to 0.849 | <b>0.000</b> |
| SLC2A14    | 1.108      | 0.970 to 1.266 | 0.132        |
| SLC2A2     | 0.897      | 0.846 to 0.951 | <b>0.000</b> |
| SLC2A3     | 1.215      | 1.058 to 1.396 | <b>0.006</b> |
| SLC2A4     | 0.914      | 0.796 to 1.048 | 0.197        |
| SLC2A4RG   | 1.215      | 0.973 to 1.517 | 0.085        |
| SLC2A5     | 0.956      | 0.866 to 1.056 | 0.373        |
| SLC2A6     | 1.669      | 1.420 to 1.963 | <b>0.000</b> |
| SLC2A7     | 0.870      | 0.668 to 1.134 | 0.304        |
| SLC2A8     | 1.013      | 0.767 to 1.338 | 0.927        |
| SLC2A9     | 0.617      | 0.544 to 0.699 | <b>0.000</b> |
| SLC3A1     | 0.788      | 0.741 to 0.839 | <b>0.000</b> |
| SLC3A2     | 1.274      | 0.940 to 1.726 | 0.118        |
| SLC4A1     | 0.951      | 0.889 to 1.018 | 0.148        |
| SLC4A1AP   | 0.832      | 0.486 to 1.427 | 0.504        |
| SLC4A2     | 1.239      | 0.873 to 1.759 | 0.229        |

|          |       |                |              |
|----------|-------|----------------|--------------|
| SLC4A3   | 1.213 | 1.136 to 1.295 | <b>0.000</b> |
| SLC4A4   | 0.731 | 0.657 to 0.812 | <b>0.000</b> |
| SLC4A5   | 1.742 | 1.491 to 2.036 | <b>0.000</b> |
| SLC4A7   | 1.145 | 0.966 to 1.357 | 0.119        |
| SLC4A8   | 1.382 | 1.162 to 1.644 | <b>0.000</b> |
| SLC4A9   | 0.998 | 0.887 to 1.124 | 0.978        |
| SLC4A10  | 1.012 | 0.896 to 1.144 | 0.844        |
| SLC4A11  | 1.102 | 0.978 to 1.241 | 0.110        |
| SLCO4C1  | 0.813 | 0.756 to 0.874 | <b>0.000</b> |
| SLCO5A1  | 1.308 | 1.148 to 1.491 | <b>0.000</b> |
| SLC5A1   | 0.867 | 0.826 to 0.909 | <b>0.000</b> |
| SLC5A2   | 0.953 | 0.890 to 1.022 | 0.178        |
| SLC5A3   | 1.121 | 0.983 to 1.279 | 0.089        |
| SLC5A4   | 0.901 | 0.812 to 0.999 | <b>0.049</b> |
| SLC5A5   | 1.199 | 1.067 to 1.348 | <b>0.002</b> |
| SLC5A6   | 2.094 | 1.702 to 2.577 | <b>0.000</b> |
| SLC5A7   | 1.122 | 0.949 to 1.328 | 0.178        |
| SLC5A8   | 0.902 | 0.866 to 0.939 | <b>0.000</b> |
| SLC5A9   | 0.982 | 0.888 to 1.086 | 0.722        |
| SLC5A10  | 0.854 | 0.809 to 0.901 | <b>0.000</b> |
| SLC5A11  | 0.967 | 0.879 to 1.065 | 0.497        |
| SLC5A12  | 0.887 | 0.846 to 0.930 | <b>0.000</b> |
| SLCO6A1  | 1.421 | 1.100 to 1.837 | <b>0.007</b> |
| SLC6A1   | 1.151 | 1.007 to 1.316 | <b>0.039</b> |
| SLC6A2   | 0.984 | 0.815 to 1.187 | 0.864        |
| SLC6A3   | 0.912 | 0.872 to 0.953 | <b>0.000</b> |
| SLC6A4   | 1.003 | 0.831 to 1.211 | 0.975        |
| SLC6A5   | 1.500 | 0.929 to 2.424 | 0.097        |
| SLC6A6   | 1.276 | 1.056 to 1.543 | <b>0.012</b> |
| SLC6A7   | 1.409 | 1.208 to 1.643 | <b>0.000</b> |
| SLC6A8   | 1.017 | 0.887 to 1.166 | 0.812        |
| SLC6A9   | 1.215 | 1.020 to 1.448 | <b>0.029</b> |
| SLC6A10P | 0.929 | 0.811 to 1.063 | 0.282        |
| SLC6A11  | 1.153 | 0.921 to 1.442 | 0.215        |
| SLC6A12  | 0.836 | 0.753 to 0.928 | <b>0.001</b> |
| SLC6A13  | 0.865 | 0.822 to 0.910 | <b>0.000</b> |
| SLC6A14  | 1.284 | 1.161 to 1.420 | <b>0.000</b> |
| SLC6A15  | 1.102 | 1.026 to 1.184 | <b>0.008</b> |
| SLC6A16  | 1.185 | 1.074 to 1.307 | <b>0.001</b> |
| SLC6A17  | 1.159 | 1.043 to 1.288 | <b>0.006</b> |
| SLC6A18  | 0.901 | 0.859 to 0.945 | <b>0.000</b> |
| SLC6A19  | 0.869 | 0.833 to 0.907 | <b>0.000</b> |
| SLC6A20  | 1.020 | 0.969 to 1.073 | 0.452        |
| SLC7A1   | 1.140 | 0.982 to 1.324 | 0.084        |

|          |       |                |              |
|----------|-------|----------------|--------------|
| SLC7A2   | 1.133 | 1.010 to 1.270 | <b>0.033</b> |
| SLC7A3   | 1.090 | 0.887 to 1.340 | 0.414        |
| SLC7A4   | 1.025 | 0.917 to 1.146 | 0.667        |
| SLC7A5   | 1.367 | 1.241 to 1.505 | <b>0.000</b> |
| SLC7A5P1 | 1.291 | 0.999 to 1.669 | 0.051        |
| SLC7A5P2 | 1.136 | 1.007 to 1.281 | <b>0.038</b> |
| SLC7A6   | 2.780 | 2.022 to 3.823 | <b>0.000</b> |
| SLC7A6OS | 0.838 | 0.574 to 1.223 | 0.359        |
| SLC7A7   | 1.067 | 0.951 to 1.198 | 0.269        |
| SLC7A8   | 0.970 | 0.860 to 1.095 | 0.625        |
| SLC7A9   | 0.867 | 0.810 to 0.927 | <b>0.000</b> |
| SLC7A10  | 1.017 | 0.906 to 1.142 | 0.772        |
| SLC7A11  | 1.275 | 1.125 to 1.444 | <b>0.000</b> |
| SLC7A13  | 0.911 | 0.811 to 1.024 | 0.117        |
| SLC7A14  | 1.037 | 0.889 to 1.210 | 0.645        |
| SLC8A1   | 0.802 | 0.686 to 0.937 | <b>0.005</b> |
| SLC8A2   | 1.175 | 1.066 to 1.296 | <b>0.001</b> |
| SLC8A3   | 0.930 | 0.818 to 1.058 | 0.273        |
| SLC9A1   | 2.205 | 1.650 to 2.948 | <b>0.000</b> |
| SLC9A10  | 0.969 | 0.823 to 1.141 | 0.706        |
| SLC9A11  | 1.191 | 1.086 to 1.307 | <b>0.000</b> |
| SLC9A2   | 1.026 | 0.954 to 1.103 | 0.490        |
| SLC9A3   | 0.941 | 0.886 to 1.000 | <b>0.049</b> |
| SLC9A3R1 | 0.820 | 0.673 to 1.001 | 0.051        |
| SLC9A3R2 | 0.763 | 0.661 to 0.880 | <b>0.000</b> |
| SLC9A4   | 0.952 | 0.854 to 1.061 | 0.373        |
| SLC9A5   | 1.397 | 1.221 to 1.598 | <b>0.000</b> |
| SLC9A6   | 0.786 | 0.534 to 1.159 | 0.225        |
| SLC9A7   | 0.931 | 0.818 to 1.059 | 0.275        |
| SLC9A8   | 1.215 | 0.844 to 1.748 | 0.295        |
| SLC9A9   | 1.227 | 1.055 to 1.427 | <b>0.008</b> |
| SLC10A1  | 1.074 | 0.913 to 1.263 | 0.388        |
| SLC10A2  | 0.845 | 0.806 to 0.887 | <b>0.000</b> |
| SLC10A3  | 1.720 | 1.195 to 2.477 | <b>0.004</b> |
| SLC10A4  | 1.149 | 0.987 to 1.337 | 0.074        |
| SLC10A5  | 0.791 | 0.693 to 0.902 | <b>0.000</b> |
| SLC10A6  | 0.772 | 0.699 to 0.854 | <b>0.000</b> |
| SLC10A7  | 0.682 | 0.491 to 0.949 | <b>0.023</b> |
| SLC11A1  | 1.491 | 1.308 to 1.700 | <b>0.000</b> |
| SLC11A2  | 1.549 | 1.137 to 2.112 | <b>0.006</b> |
| SLC12A1  | 0.977 | 0.927 to 1.030 | 0.389        |
| SLC12A2  | 0.728 | 0.609 to 0.871 | <b>0.001</b> |
| SLC12A3  | 0.972 | 0.907 to 1.041 | 0.417        |
| SLC12A4  | 0.550 | 0.408 to 0.741 | <b>0.000</b> |

|          |       |                |              |
|----------|-------|----------------|--------------|
| SLC12A5  | 1.145 | 0.984 to 1.331 | 0.080        |
| SLC12A6  | 0.634 | 0.505 to 0.796 | <b>0.000</b> |
| SLC12A7  | 0.704 | 0.592 to 0.836 | <b>0.000</b> |
| SLC12A8  | 1.281 | 1.175 to 1.397 | <b>0.000</b> |
| SLC12A9  | 1.884 | 1.418 to 2.503 | <b>0.000</b> |
| SLC13A1  | 0.889 | 0.851 to 0.929 | <b>0.000</b> |
| SLC13A2  | 0.911 | 0.840 to 0.987 | <b>0.023</b> |
| SLC13A3  | 1.066 | 1.008 to 1.127 | <b>0.026</b> |
| SLC13A4  | 1.263 | 1.122 to 1.422 | <b>0.000</b> |
| SLC13A5  | 1.122 | 0.999 to 1.260 | 0.051        |
| SLC14A1  | 0.816 | 0.736 to 0.904 | <b>0.000</b> |
| SLC14A2  | 1.103 | 0.981 to 1.241 | 0.102        |
| SLC15A1  | 1.010 | 0.957 to 1.066 | 0.715        |
| SLC15A2  | 1.006 | 0.899 to 1.127 | 0.913        |
| SLC15A3  | 1.124 | 0.927 to 1.364 | 0.235        |
| SLC15A4  | 1.202 | 0.927 to 1.560 | 0.165        |
| SLC16A1  | 1.315 | 1.042 to 1.660 | <b>0.021</b> |
| SLC16A10 | 1.021 | 0.915 to 1.139 | 0.715        |
| SLC16A11 | 0.852 | 0.754 to 0.962 | <b>0.010</b> |
| SLC16A12 | 0.789 | 0.746 to 0.835 | <b>0.000</b> |
| SLC16A13 | 0.778 | 0.669 to 0.905 | <b>0.001</b> |
| SLC16A14 | 0.824 | 0.656 to 1.035 | 0.096        |
| SLC16A2  | 0.905 | 0.759 to 1.080 | 0.270        |
| SLC16A3  | 1.174 | 0.944 to 1.460 | 0.149        |
| SLC16A4  | 0.760 | 0.676 to 0.854 | <b>0.000</b> |
| SLC16A5  | 1.058 | 0.915 to 1.223 | 0.447        |
| SLC16A6  | 0.984 | 0.859 to 1.128 | 0.819        |
| SLC16A7  | 0.933 | 0.821 to 1.059 | 0.284        |
| SLC16A8  | 1.372 | 1.176 to 1.601 | <b>0.000</b> |
| SLC16A9  | 0.811 | 0.755 to 0.870 | <b>0.000</b> |
| SLC17A1  | 0.887 | 0.838 to 0.940 | <b>0.000</b> |
| SLC17A2  | 0.866 | 0.808 to 0.928 | <b>0.000</b> |
| SLC17A3  | 0.896 | 0.855 to 0.939 | <b>0.000</b> |
| SLC17A4  | 0.888 | 0.841 to 0.937 | <b>0.000</b> |
| SLC17A5  | 0.724 | 0.582 to 0.902 | <b>0.004</b> |
| SLC17A6  | 2.276 | 1.163 to 4.453 | <b>0.016</b> |
| SLC17A7  | 1.252 | 1.124 to 1.395 | <b>0.000</b> |
| SLC17A8  | 0.955 | 0.847 to 1.077 | 0.456        |
| SLC17A9  | 1.372 | 1.250 to 1.505 | <b>0.000</b> |
| SLC18A1  | 0.990 | 0.823 to 1.191 | 0.917        |
| SLC18A2  | 0.794 | 0.708 to 0.890 | <b>0.000</b> |
| SLC18A3  | 1.120 | 1.071 to 1.172 | <b>0.000</b> |
| SLC19A1  | 1.773 | 1.466 to 2.145 | <b>0.000</b> |
| SLC19A2  | 1.054 | 0.892 to 1.246 | 0.538        |

|            |       |                |              |
|------------|-------|----------------|--------------|
| SLC19A3    | 1.080 | 0.963 to 1.212 | 0.190        |
| SLC20A1    | 2.118 | 1.699 to 2.641 | <b>0.000</b> |
| SLC20A2    | 0.718 | 0.521 to 0.990 | <b>0.043</b> |
| SLC22A1    | 1.243 | 1.130 to 1.368 | <b>0.000</b> |
| SLC22A10   | 0.781 | 0.600 to 1.107 | 0.066        |
| SLC22A11   | 0.869 | 0.824 to 0.917 | <b>0.000</b> |
| SLC22A12   | 0.884 | 0.844 to 0.925 | <b>0.000</b> |
| SLC22A13   | 0.879 | 0.821 to 0.941 | <b>0.000</b> |
| SLC22A14   | 1.088 | 0.972 to 1.218 | 0.142        |
| SLC22A15   | 1.369 | 1.191 to 1.574 | <b>0.000</b> |
| SLC22A16   | 0.986 | 0.872 to 1.115 | 0.825        |
| SLC22A17   | 1.122 | 0.961 to 1.311 | 0.145        |
| SLC22A18   | 1.048 | 0.892 to 1.230 | 0.569        |
| SLC22A18AS | 1.030 | 0.898 to 1.182 | 0.672        |
| SLC22A2    | 0.873 | 0.835 to 0.912 | <b>0.000</b> |
| SLC22A20   | 1.312 | 1.164 to 1.478 | <b>0.000</b> |
| SLC22A23   | 0.751 | 0.608 to 0.928 | <b>0.008</b> |
| SLC22A24   | 0.791 | 0.728 to 0.860 | <b>0.000</b> |
| SLC22A25   | 1.048 | 0.765 to 1.435 | 0.771        |
| SLC22A3    | 0.947 | 0.860 to 1.043 | 0.271        |
| SLC22A4    | 0.757 | 0.670 to 0.855 | <b>0.000</b> |
| SLC22A5    | 0.736 | 0.623 to 0.870 | <b>0.000</b> |
| SLC22A6    | 0.890 | 0.854 to 0.928 | <b>0.000</b> |
| SLC22A7    | 0.878 | 0.824 to 0.936 | <b>0.000</b> |
| SLC22A8    | 0.865 | 0.810 to 0.924 | <b>0.000</b> |
| SLC22A9    | 0.860 | 0.755 to 0.980 | <b>0.023</b> |
| SLC23A1    | 0.958 | 0.886 to 1.036 | 0.281        |
| SLC23A2    | 0.968 | 0.732 to 1.280 | 0.819        |
| SLC23A3    | 0.884 | 0.833 to 0.938 | <b>0.000</b> |
| SLC24A1    | 0.759 | 0.557 to 1.036 | 0.082        |
| SLC24A2    | 1.064 | 0.853 to 1.326 | 0.583        |
| SLC24A3    | 0.998 | 0.911 to 1.093 | 0.966        |
| SLC24A4    | 0.788 | 0.663 to 0.935 | <b>0.006</b> |
| SLC24A5    | 1.199 | 1.060 to 1.357 | <b>0.004</b> |
| SLC24A6    | 1.919 | 1.310 to 2.812 | <b>0.001</b> |
| SLC25A1    | 1.288 | 1.029 to 1.613 | <b>0.027</b> |
| SLC25A10   | 1.078 | 0.911 to 1.275 | 0.381        |
| SLC25A11   | 0.807 | 0.578 to 1.126 | 0.207        |
| SLC25A12   | 1.093 | 0.693 to 1.725 | 0.701        |
| SLC25A13   | 0.542 | 0.399 to 0.736 | <b>0.000</b> |
| SLC25A14   | 2.109 | 1.490 to 2.987 | <b>0.000</b> |
| SLC25A15   | 1.277 | 1.000 to 1.630 | 0.050        |
| SLC25A16   | 1.283 | 0.983 to 1.676 | 0.067        |
| SLC25A17   | 0.995 | 0.586 to 1.690 | 0.985        |

|          |       |                |              |
|----------|-------|----------------|--------------|
| SLC25A18 | 1.101 | 0.962 to 1.261 | 0.161        |
| SLC25A19 | 2.069 | 1.648 to 2.597 | <b>0.000</b> |
| SLC25A2  | 1.416 | 1.227 to 1.635 | <b>0.000</b> |
| SLC25A20 | 0.649 | 0.451 to 0.935 | <b>0.020</b> |
| SLC25A21 | 0.848 | 0.758 to 0.949 | <b>0.004</b> |
| SLC25A22 | 2.041 | 1.634 to 2.549 | <b>0.000</b> |
| SLC25A23 | 0.596 | 0.476 to 0.745 | <b>0.000</b> |
| SLC25A24 | 0.618 | 0.513 to 0.745 | <b>0.000</b> |
| SLC25A25 | 0.914 | 0.731 to 1.143 | 0.431        |
| SLC25A26 | 1.076 | 0.778 to 1.487 | 0.658        |
| SLC25A27 | 1.156 | 1.045 to 1.278 | <b>0.005</b> |
| SLC25A28 | 1.573 | 1.148 to 2.155 | <b>0.005</b> |
| SLC25A29 | 1.473 | 1.244 to 1.743 | <b>0.000</b> |
| SLC25A3  | 1.206 | 0.827 to 1.759 | 0.330        |
| SLC25A30 | 0.646 | 0.513 to 0.815 | <b>0.000</b> |
| SLC25A31 | 1.179 | 0.804 to 1.729 | 0.399        |
| SLC25A32 | 1.734 | 1.128 to 2.665 | <b>0.012</b> |
| SLC25A33 | 1.018 | 0.826 to 1.254 | 0.868        |
| SLC25A34 | 0.883 | 0.785 to 0.993 | <b>0.037</b> |
| SLC25A35 | 1.932 | 1.573 to 2.373 | <b>0.000</b> |
| SLC25A36 | 1.383 | 1.002 to 1.911 | <b>0.049</b> |
| SLC25A37 | 1.727 | 1.452 to 2.054 | <b>0.000</b> |
| SLC25A38 | 1.441 | 1.021 to 2.033 | <b>0.037</b> |
| SLC25A39 | 1.840 | 1.448 to 2.339 | <b>0.000</b> |
| SLC25A4  | 0.503 | 0.407 to 0.621 | <b>0.000</b> |
| SLC25A40 | 0.787 | 0.696 to 0.891 | <b>0.000</b> |
| SLC25A41 | 1.044 | 0.899 to 1.213 | 0.569        |
| SLC25A42 | 0.642 | 0.538 to 0.767 | <b>0.000</b> |
| SLC25A43 | 1.155 | 0.848 to 1.572 | 0.361        |
| SLC25A44 | 0.635 | 0.470 to 0.859 | <b>0.003</b> |
| SLC25A45 | 1.261 | 1.021 to 1.558 | <b>0.031</b> |
| SLC25A46 | 0.694 | 0.576 to 0.836 | <b>0.000</b> |
| SLC25A5  | 0.880 | 0.662 to 1.171 | 0.380        |
| SLC25A6  | 1.152 | 0.892 to 1.488 | 0.277        |
| SLC26A1  | 0.854 | 0.759 to 0.960 | <b>0.008</b> |
| SLC26A10 | 1.191 | 1.094 to 1.298 | <b>0.000</b> |
| SLC26A11 | 1.307 | 0.956 to 1.788 | 0.094        |
| SLC26A2  | 0.927 | 0.699 to 1.230 | 0.600        |
| SLC26A3  | 1.202 | 1.006 to 1.436 | <b>0.043</b> |
| SLC26A4  | 0.834 | 0.699 to 0.995 | <b>0.044</b> |
| SLC26A5  | 1.111 | 0.841 to 1.469 | 0.459        |
| SLC26A6  | 1.777 | 1.503 to 2.100 | <b>0.000</b> |
| SLC26A7  | 1.042 | 0.953 to 1.139 | 0.364        |
| SLC26A8  | 1.469 | 1.214 to 1.778 | <b>0.000</b> |

|          |       |                |              |
|----------|-------|----------------|--------------|
| SLC26A9  | 0.937 | 0.877 to 1.000 | 0.051        |
| SLC27A1  | 1.023 | 0.748 to 1.400 | 0.886        |
| SLC27A2  | 0.799 | 0.748 to 0.853 | <b>0.000</b> |
| SLC27A3  | 1.347 | 1.051 to 1.728 | <b>0.019</b> |
| SLC27A4  | 1.268 | 0.960 to 1.676 | 0.095        |
| SLC27A5  | 1.125 | 0.959 to 1.319 | 0.148        |
| SLC27A6  | 1.118 | 0.842 to 1.483 | 0.441        |
| SLC28A1  | 0.776 | 0.721 to 0.835 | <b>0.000</b> |
| SLC28A2  | 0.908 | 0.682 to 1.208 | 0.506        |
| SLC28A3  | 1.144 | 0.981 to 1.334 | 0.087        |
| SLC29A1  | 1.449 | 1.173 to 1.789 | <b>0.001</b> |
| SLC29A2  | 1.006 | 0.915 to 1.106 | 0.904        |
| SLC29A3  | 1.375 | 1.125 to 1.681 | <b>0.002</b> |
| SLC29A4  | 1.010 | 0.895 to 1.140 | 0.876        |
| SLC30A1  | 0.671 | 0.575 to 0.782 | <b>0.000</b> |
| SLC30A10 | 1.019 | 0.939 to 1.106 | 0.654        |
| SLC30A2  | 0.994 | 0.931 to 1.063 | 0.866        |
| SLC30A3  | 1.114 | 1.002 to 1.239 | <b>0.046</b> |
| SLC30A4  | 0.735 | 0.658 to 0.821 | <b>0.000</b> |
| SLC30A5  | 0.676 | 0.490 to 0.932 | <b>0.017</b> |
| SLC30A6  | 0.725 | 0.596 to 0.883 | <b>0.001</b> |
| SLC30A7  | 0.945 | 0.638 to 1.398 | 0.775        |
| SLC30A8  | 0.977 | 0.893 to 1.069 | 0.611        |
| SLC30A9  | 0.473 | 0.364 to 0.614 | <b>0.000</b> |
| SLC31A1  | 0.638 | 0.490 to 0.831 | <b>0.001</b> |
| SLC31A2  | 0.797 | 0.649 to 0.977 | <b>0.029</b> |
| SLC32A1  | 1.706 | 1.071 to 2.719 | <b>0.025</b> |
| SLC33A1  | 0.524 | 0.400 to 0.687 | <b>0.000</b> |
| SLC34A1  | 0.890 | 0.835 to 0.948 | <b>0.000</b> |
| SLC34A2  | 1.044 | 1.000 to 1.090 | <b>0.048</b> |
| SLC34A3  | 0.924 | 0.847 to 1.007 | 0.072        |
| SLC35A1  | 1.280 | 0.880 to 1.862 | 0.197        |
| SLC35A2  | 2.187 | 1.594 to 3.000 | <b>0.000</b> |
| SLC35A3  | 0.728 | 0.643 to 0.824 | <b>0.000</b> |
| SLC35A4  | 0.887 | 0.583 to 1.350 | 0.576        |
| SLC35A5  | 0.522 | 0.400 to 0.681 | <b>0.000</b> |
| SLC35B1  | 1.746 | 1.251 to 2.438 | <b>0.001</b> |
| SLC35B2  | 2.019 | 1.378 to 2.959 | <b>0.000</b> |
| SLC35B3  | 0.940 | 0.623 to 1.417 | 0.767        |
| SLC35B4  | 0.595 | 0.429 to 0.826 | <b>0.002</b> |
| SLC35C1  | 1.536 | 1.062 to 2.221 | <b>0.023</b> |
| SLC35C2  | 2.517 | 1.888 to 3.354 | <b>0.000</b> |
| SLC35D1  | 0.748 | 0.588 to 0.952 | <b>0.018</b> |
| SLC35D2  | 0.678 | 0.480 to 0.956 | <b>0.027</b> |

|          |       |                |              |
|----------|-------|----------------|--------------|
| SLC35D3  | 1.742 | 1.284 to 2.363 | <b>0.000</b> |
| SLC35E1  | 0.713 | 0.469 to 1.084 | 0.113        |
| SLC35E2  | 0.988 | 0.832 to 1.172 | 0.889        |
| SLC35E3  | 0.794 | 0.596 to 1.056 | 0.113        |
| SLC35E4  | 2.186 | 1.691 to 2.825 | <b>0.000</b> |
| SLC35F1  | 0.824 | 0.730 to 0.930 | <b>0.002</b> |
| SLC35F2  | 1.258 | 0.998 to 1.584 | 0.052        |
| SLC35F3  | 1.144 | 1.057 to 1.237 | <b>0.001</b> |
| SLC35F4  | 1.171 | 0.967 to 1.419 | 0.105        |
| SLC35F5  | 0.689 | 0.546 to 0.869 | <b>0.002</b> |
| SLC36A1  | 0.991 | 0.801 to 1.227 | 0.937        |
| SLC36A2  | 1.046 | 0.983 to 1.113 | 0.154        |
| SLC36A3  | 0.857 | 0.566 to 1.296 | 0.465        |
| SLC36A4  | 0.867 | 0.657 to 1.144 | 0.313        |
| SLC37A1  | 1.291 | 0.996 to 1.673 | 0.053        |
| SLC37A2  | 0.900 | 0.778 to 1.040 | 0.153        |
| SLC37A3  | 1.170 | 0.851 to 1.610 | 0.333        |
| SLC37A4  | 0.805 | 0.652 to 0.994 | <b>0.044</b> |
| SLC38A1  | 0.886 | 0.722 to 1.088 | 0.249        |
| SLC38A10 | 1.972 | 1.410 to 2.756 | <b>0.000</b> |
| SLC38A11 | 0.857 | 0.769 to 0.955 | <b>0.005</b> |
| SLC38A2  | 0.994 | 0.733 to 1.349 | 0.971        |
| SLC38A3  | 1.145 | 1.071 to 1.223 | <b>0.000</b> |
| SLC38A4  | 0.987 | 0.928 to 1.050 | 0.682        |
| SLC38A5  | 1.199 | 1.134 to 1.267 | <b>0.000</b> |
| SLC38A6  | 1.430 | 1.103 to 1.852 | <b>0.007</b> |
| SLC38A7  | 1.224 | 0.929 to 1.612 | 0.151        |
| SLC38A8  | 0.996 | 0.766 to 1.294 | 0.975        |
| SLC38A9  | 1.181 | 0.799 to 1.745 | 0.405        |
| SLC39A1  | 1.375 | 0.923 to 2.048 | 0.118        |
| SLC39A10 | 0.793 | 0.597 to 1.055 | 0.112        |
| SLC39A11 | 1.679 | 1.320 to 2.137 | <b>0.000</b> |
| SLC39A12 | 1.520 | 1.112 to 2.078 | <b>0.009</b> |
| SLC39A13 | 2.254 | 1.671 to 3.040 | <b>0.000</b> |
| SLC39A14 | 1.058 | 0.921 to 1.216 | 0.426        |
| SLC39A2  | 1.083 | 0.916 to 1.279 | 0.351        |
| SLC39A3  | 1.602 | 1.226 to 2.094 | <b>0.001</b> |
| SLC39A4  | 1.025 | 0.908 to 1.159 | 0.687        |
| SLC39A5  | 0.877 | 0.831 to 0.926 | <b>0.000</b> |
| SLC39A6  | 1.082 | 0.850 to 1.376 | 0.523        |
| SLC39A7  | 1.304 | 0.859 to 1.980 | 0.212        |
| SLC39A8  | 0.651 | 0.540 to 0.785 | <b>0.000</b> |
| SLC39A9  | 0.448 | 0.319 to 0.629 | <b>0.000</b> |
| SLC40A1  | 0.654 | 0.570 to 0.750 | <b>0.000</b> |



|         |       |                |              |
|---------|-------|----------------|--------------|
| SLC41A1 | 0.792 | 0.613 to 1.024 | 0.075        |
| SLC41A2 | 0.815 | 0.649 to 1.024 | 0.079        |
| SLC41A3 | 0.997 | 0.736 to 1.350 | 0.984        |
| SLC43A1 | 1.404 | 1.188 to 1.659 | <b>0.000</b> |
| SLC43A2 | 0.890 | 0.711 to 1.115 | 0.312        |
| SLC43A3 | 1.457 | 1.214 to 1.748 | <b>0.000</b> |
| SLC44A1 | 0.513 | 0.392 to 0.672 | <b>0.000</b> |
| SLC44A2 | 0.598 | 0.465 to 0.769 | <b>0.000</b> |
| SLC44A3 | 0.661 | 0.569 to 0.769 | <b>0.000</b> |
| SLC44A4 | 0.804 | 0.739 to 0.875 | <b>0.000</b> |
| SLC44A5 | 1.033 | 0.982 to 1.086 | 0.209        |
| SLC45A1 | 0.854 | 0.724 to 1.007 | 0.060        |
| SLC45A2 | 1.147 | 1.040 to 1.265 | <b>0.006</b> |
| SLC45A3 | 1.087 | 0.926 to 1.275 | 0.309        |
| SLC45A4 | 0.669 | 0.541 to 0.827 | <b>0.000</b> |
| SLC46A1 | 0.627 | 0.489 to 0.804 | <b>0.000</b> |
| SLC46A2 | 1.275 | 1.095 to 1.485 | <b>0.002</b> |
| SLC46A3 | 1.171 | 0.950 to 1.443 | 0.139        |
| SLC47A1 | 0.802 | 0.756 to 0.851 | <b>0.000</b> |
| SLC47A2 | 0.933 | 0.860 to 1.012 | 0.096        |
| SLC48A1 | 0.967 | 0.718 to 1.302 | 0.825        |
| SLCO1A2 | 1.008 | 0.933 to 1.089 | 0.845        |
| SLCO1B1 | 1.118 | 0.951 to 1.315 | 0.177        |
| SLCO1B3 | 1.369 | 1.173 to 1.597 | <b>0.000</b> |
| SLCO1C1 | 0.974 | 0.861 to 1.102 | 0.675        |
| SLCO2A1 | 0.740 | 0.675 to 0.811 | <b>0.000</b> |
| SLCO2B1 | 0.940 | 0.807 to 1.094 | 0.423        |
| SLCO3A1 | 0.891 | 0.671 to 1.184 | 0.427        |
| SLCO4A1 | 0.968 | 0.872 to 1.073 | 0.532        |

---

\*Bold type indicates statistical significance; only significant ( $p < 0.01$ ) parameters in univariate cox regression model and with measurable RNA expression enrolled in multivariate model  
sex: female vs male

Supplementary Table 2 Gene annotations of upregulated SLC associated with poor outcome of ccRCC

| Gene Name | UniGene                               | Gene Full name                                                                 | Gene Ontology*                                                                     |
|-----------|---------------------------------------|--------------------------------------------------------------------------------|------------------------------------------------------------------------------------|
| SLC7A9    | Hs.408567                             | solute carrier family 7 (cationic amino acid transporter, y+ system), member 9 | Cationic amino acid transporter/glycoprotein-associated                            |
| SLC9A5    | Hs.439650                             | solute carrier family 9 (sodium/hydrogen exchanger), member 5                  | Na <sup>+</sup> /H <sup>+</sup> exchanger                                          |
| SLC10A5   | Hs.683849                             | solute carrier family 10 (sodium/bile acid cotransporter family), member 5     | Sodium bile salt cotransporter                                                     |
| SLC12A7   | Hs.172613                             | solute carrier family 12 (potassium/chloride transporters), member 7           | Collecting duct acid secretion                                                     |
| SLC16A8   | Hs.270285                             | solute carrier family 16, member 8 (monocarboxylic acid transporter 3)         | Monocarboxylate transporter                                                        |
| SLC18A3   | Hs.654374                             | solute carrier family 18 (vesicular acetylcholine), member 3                   | Vesicular amine transporter/H <sup>+</sup> antiporter-1 (12 spanner) (DHA1) family |
| SLC25A14  | Hs.194686                             | solute carrier family 25 (mitochondrial carrier, brain), member 14             | Mitochondrial carrier                                                              |
| SLC25A28  | Hs.403790                             | solute carrier family 25, member 28                                            | Mitochondrial carrier                                                              |
| SLC25A37  | Hs.596025;<br>Hs.658208;<br>Hs.122514 | solute carrier family 25, member 37                                            | Mitochondrial carrier                                                              |
| SLC35E4   | Hs.660384                             | solute carrier family 35, member E4                                            | Nucleoside-sugar transporter                                                       |
| SLC35F3   | Hs.158748                             | solute carrier family 35, member F3                                            | Nucleoside-sugar transporter                                                       |
| SLC38A10  | Hs.352240                             | solute carrier family 38, member 10                                            | System A and System N sodium-coupled neutral amino acid transporter                |
| SLC38A6   | Hs.200738                             | solute carrier family 38, member 6                                             | System A and System N sodium-coupled neutral amino acid transporter                |
| SLCO2A1   | Hs.518270                             | solute carrier organic anion transporter family, member 2A1                    | Organic anion transporter                                                          |
| SLCO4C1   | Hs.127648                             | solute carrier organic anion transporter family, member 4C1                    | Organic anion transporter                                                          |

\* Gene ontology were annotated by KEGG brite

Supplementary Table 3 Gene annotations of upregulated SLC associated with favorable outcome of ccRCC

| Gene Name | UniGene             | Gene Full name                                                                     | Gene Ontology*                                              |
|-----------|---------------------|------------------------------------------------------------------------------------|-------------------------------------------------------------|
| SLC4A5    | Hs.594099           | solute carrier family 4, sodium bicarbonate cotransporter, member 5                | Bicarbonate transporter;Exosomal proteins                   |
| SLC5A5    | Hs.584804           | solute carrier family 5 (sodium iodide symporter), member 5                        | Sodium glucose cotransporter                                |
| SLC6A7    | Hs.241597           | solute carrier family 6 (neurotransmitter transporter, L-proline), member 7        | Sodium- and chloride-dependent neurotransmitter transporter |
| SLC10A2   | Hs.194783           | solute carrier family 10 (sodium/bile acid cotransporter family), member 2         | Sodium bile salt cotransporter                              |
| SLC10A6   | Hs.452996           | solute carrier family 10 (sodium/bile acid cotransporter family), member 6         | Sodium bile salt cotransporter                              |
| SLC12A4   | Hs.10094            | solute carrier family 12 (potassium/chloride transporters), member 4               | Electroneutral cation-coupled Cl cotransporter              |
| SLC25A19  | Hs.514470           | solute carrier family 25 (mitochondrial thiamine pyrophosphate carrier), member 19 | Mitochondrial carrier                                       |
| SLC40A1   | Hs.643005           | solute carrier family 40 (iron-regulated transporter), member 1                    | Basolateral iron transporter                                |
| SLC45A2   | Hs.278962           | solute carrier family 45, member 2                                                 | Putative sugar transporter                                  |
| SLC47A1   | Hs.232054           | solute carrier family 47, member 1                                                 | Multidrug and Toxin Extrusion (MATE) family                 |
| SLCO5A1   | Hs.152460,Hs.443609 | solute carrier organic anion transporter family, member 5A1                        | Organic anion transporter                                   |

\* Gene ontology were annotated by KEGG brite

Supplementary Table 4. Comparison of ccRCC SLC expression in sunitinib treated samples

| Gene Name | Human cohort    |                          |             |              | Mice Xenograft   |                         |       |              |    |
|-----------|-----------------|--------------------------|-------------|--------------|------------------|-------------------------|-------|--------------|----|
|           | Untreated(N=47) | Sunitinib treated (N=75) |             | P*           | Untreated(N=15)  | Sunitinib treated(N=14) |       | Fold change  | P* |
|           | Mean±SD         | Mean±SD                  | Fold change |              | Mean±SD          | Mean±SD                 |       |              |    |
| SLC4A5    | 4.865±0.564     | 4.870±0.482              | 1.003       | 0.945        | 93.111 ± 83.920  | 138.085±165.454         | 1.483 | 0.110        |    |
| SLC4A8    | 4.351±0.542     | 4.074±0.374              | 0.825       | <b>0.001</b> | 30.472 ± 18.835  | 26.857 ± 24.911         | 0.881 | 0.445        |    |
| SLC5A5    | 3.601±0.395     | 3.547±0.285              | 0.963       | 0.377        | 111.629± 64.373  | 114.407± 53.193         | 1.025 | 0.901        |    |
| SLC5A6    | 6.199±0.451     | 6.000±0.465              | 0.871       | <b>0.022</b> | 350.582±164.987  | 293.310±118.365         | 0.837 | 0.295        |    |
| SLC6A15   | 4.184±0.691     | 4.260±0.766              | 1.054       | 0.334        | 15.631 ± 14.710  | 13.517 ± 14.028         | 0.865 | 0.431        |    |
| SLC6A19   | 4.196±0.573     | 4.481±0.495              | 1.218       | <b>0.004</b> | 31.686± 25.957   | 31.686 ± 29.151         | 1.000 | 1.000        |    |
| SLC6A7    | 4.436±0.562     | 4.675±0.424              | 1.180       | <b>0.009</b> | 9.236 ± 3.219    | 7.724 ± 2.435           | 0.836 | 0.167        |    |
| SLC7A9    | 4.835±0.645     | 4.763±0.519              | 0.951       | 0.501        | 374.638±497.822  | 488.409±534.937         | 1.304 | 0.558        |    |
| SLC9A3R2  | 3.875±0.576     | 3.770±0.401              | 0.930       | 0.235        | 13.871 ± 10.266  | 14.442 ± 13.314         | 1.041 | 0.898        |    |
| SLC9A5    | 4.954±0.471     | 5.185±0.381              | 1.174       | <b>0.004</b> | 47.751 ± 37.596  | 56.846 ± 38.587         | 1.190 | 0.269        |    |
| SLC10A2   | 4.923±0.950     | 4.484±0.443              | 0.738       | <b>0.001</b> | 84.639 ± 42.102  | 50.521 ± 24.038         | 0.597 | <b>0.013</b> |    |
| SLC10A5   | 3.992±0.713     | 3.979±0.447              | 0.991       | 0.901        | NA               | NA                      |       |              |    |
| SLC10A6   | 3.927±0.697     | 4.197±0.467              | 1.206       | <b>0.012</b> | NA               | NA                      |       |              |    |
| SLC11A2   | 6.901±0.648     | 6.777±0.487              | 0.918       | 0.229        | 442.370±463.919  | 578.290±600.101         | 1.307 | 0.128        |    |
| SLC12A4   | 4.662±0.595     | 4.578±0.459              | 0.943       | 0.382        | 93.192 ± 79.382  | 89.461 ± 78.260         | 0.960 | 0.776        |    |
| SLC12A7   | 4.076±0.566     | 4.028±0.484              | 0.967       | 0.616        | 1130.925±393.716 | 1066.661±379.933        | 0.943 | 0.659        |    |
| SLC12A8   | 5.311±0.492     | 5.183±0.765              | 0.915       | 0.312        | 528.539±244.738  | 640.068±382.804         | 1.211 | 0.355        |    |
| SLC13A4   | 4.822±0.470     | 4.830±0.433              | 1.006       | 0.923        | 58.937 ± 34.774  | 55.482 ± 35.567         | 0.941 | 0.793        |    |
| SLC14A1   | 4.743±0.381     | 5.000±0.460              | 1.195       | <b>0.002</b> | 13.183 ± 12.122  | 14.186 ± 10.389         | 1.076 | 0.737        |    |
| SLC16A8   | 3.381±0.478     | 3.502±0.282              | 1.087       | 0.082        | 52.620 ± 36.301  | 31.979 ± 21.251         | 0.608 | 0.075        |    |
| SLC17A1   | 4.914±0.722     | 5.054±0.527              | 1.102       | 0.219        | 125.545± 99.525  | 47.326 ± 40.767         | 0.377 | <b>0.000</b> |    |
| SLC17A5   | NA              | NA                       |             |              | 1136.002±384.012 | 1314.529±576.794        | 1.157 | 0.168        |    |

|          |             |             |       |              |                   |                   |       |              |
|----------|-------------|-------------|-------|--------------|-------------------|-------------------|-------|--------------|
| SLC17A7  | 4.081±0.473 | 4.258±0.481 | 1.131 | <b>0.048</b> | 83.343 ± 51.558   | 83.739 ± 47.969   | 1.005 | 0.976        |
| SLC18A3  | 4.175±0.556 | 4.165±0.536 | 0.993 | 0.923        | 35.927 ± 24.574   | 25.873 ± 11.899   | 0.720 | 0.177        |
| SLC20A1  | 7.964±0.791 | 8.062±0.598 | 1.070 | 0.439        | 1232.182±1051.328 | 1623.184±1433.573 | 1.317 | 0.239        |
| SLC22A2  | 5.180±1.355 | 5.285±1.266 | 1.075 | 0.538        | 164.711±166.961   | 17.845 ± 15.874   | 0.108 | <b>0.003</b> |
| SLC22A20 | <i>NA</i>   | <i>NA</i>   |       |              | <i>NA</i>         | <i>NA</i>         |       |              |
| SLC24A6  | 4.893±0.568 | 4.617±0.505 | 0.826 | <b>0.006</b> | 215.337± 87.345   | 182.915± 87.842   | 0.849 | 0.164        |
| SLC25A14 | 5.472±0.618 | 5.458±0.645 | 0.990 | 0.870        | 633.860±149.945   | 629.087±221.022   | 0.992 | 0.923        |
| SLC25A19 | 6.366±0.327 | 6.281±0.309 | 0.943 | 0.156        | 280.044± 51.137   | 217.647± 67.401   | 0.777 | <b>0.009</b> |
| SLC25A23 | 4.812±0.650 | 4.718±0.551 | 0.937 | 0.394        | 311.508±184.320   | 302.922±207.436   | 0.972 | 0.868        |
| SLC25A27 | 4.652±0.647 | 4.549±0.505 | 0.931 | 0.327        | 18.976 ± 19.760   | 19.361 ± 19.799   | 1.020 | 0.907        |
| SLC25A28 | 5.975±0.357 | 5.997±0.404 | 1.015 | 0.754        | 668.823±130.871   | 622.189±206.043   | 0.930 | 0.305        |
| SLC25A29 | 4.296±0.568 | 4.251±0.440 | 0.969 | 0.485        | 153.006±143.706   | 140.217±130.360   | 0.916 | 0.617        |
| SLC25A35 | 3.891±0.416 | 3.840±0.345 | 0.965 | 0.466        | 103.446± 51.567   | 105.724± 52.410   | 1.022 | 0.868        |
| SLC25A37 | 5.802±0.882 | 5.811±1.015 | 1.006 | 0.957        | 357.676±278.655   | 450.800±397.458   | 1.260 | <b>0.021</b> |
| SLC25A39 | 7.045±0.748 | 6.544±0.489 | 0.707 | <b>0.000</b> | 2005.105±454.516  | 1889.387±577.368  | 0.942 | 0.552        |
| SLC25A46 | 5.169±0.432 | 4.974±0.429 | 0.874 | <b>0.016</b> | 2958.335±388.591  | 2969.176±834.714  | 1.004 | 0.949        |
| SLC26A1  | 4.172±0.608 | 4.273±0.585 | 1.073 | 0.113        | 6.449 ± 4.196     | 5.202 ± 2.971     | 0.807 | 0.200        |
| SLC26A8  | 4.555±0.789 | 4.617±0.760 | 1.044 | 0.383        | 22.849 ± 23.333   | 20.318 ± 20.657   | 0.889 | 0.760        |
| SLC2A13  | 4.136±0.585 | 3.911±0.357 | 0.856 | <b>0.009</b> | 403.887±646.058   | 371.291±607.660   | 0.919 | 0.755        |
| SLC30A1  | 5.866±0.492 | 5.906±0.590 | 1.028 | 0.589        | 1329.436±1708.261 | 1305.558±1789.612 | 0.982 | 0.949        |
| SLC35A3  | 5.153±0.533 | 5.081±0.401 | 0.951 | 0.399        | 1524.829±562.436  | 1308.095±537.745  | 0.858 | 0.070        |
| SLC35B2  | 6.427±0.421 | 6.093±0.474 | 0.793 | <b>0.000</b> | 2303.924±402.700  | 2275.986±656.965  | 0.988 | 0.890        |
| SLC35B4  | 4.912±0.421 | 4.711±0.440 | 0.870 | <b>0.014</b> | 839.903±575.338   | 864.257±614.435   | 1.029 | 0.849        |
| SLC35D3  | 3.653±0.534 | 3.649±0.319 | 0.997 | 0.961        | 19.989 ± 11.997   | 20.793 ± 15.559   | 1.040 | 0.877        |
| SLC35E4  | 4.040±0.463 | 4.155±0.468 | 1.083 | 0.186        | 76.827 ± 75.488   | 76.657 ± 70.822   | 0.998 | 0.993        |
| SLC35F3  | 4.139±0.735 | 4.117±0.540 | 0.985 | 0.788        | 93.322 ± 127.318  | 98.903 ± 127.346  | 1.060 | 0.868        |

|          |             |             |       |              |                   |                   |       |              |
|----------|-------------|-------------|-------|--------------|-------------------|-------------------|-------|--------------|
| SLC35F5  | 6.255±0.326 | 5.931±0.393 | 0.799 | <b>0.000</b> | 1445.362±2016.242 | 1244.108±1813.762 | 0.861 | 0.627        |
| SLC38A10 | 4.223±0.539 | 4.241±0.459 | 1.013 | 0.727        | 193.725±332.877   | 189.588±342.137   | 0.979 | 0.931        |
| SLC38A11 | 5.403±0.524 | 5.330±0.397 | 0.951 | 0.384        | 29.048 ± 15.500   | 21.450 ± 15.484   | 0.738 | 0.198        |
| SLC38A6  | 5.219±0.554 | 5.123±0.482 | 0.936 | 0.318        | 1353.917±239.693  | 862.577±259.785   | 0.637 | <b>0.000</b> |
| SLC39A3  | 4.618±0.440 | 4.674±0.566 | 1.040 | 0.149        | 233.184±264.160   | 198.410±212.839   | 0.851 | 0.503        |
| SLC39A9  | 5.237±0.423 | 5.047±0.528 | 0.877 | <b>0.040</b> | 3964.148±4319.011 | 3690.185±4087.913 | 0.931 | 0.727        |
| SLC40A1  | 7.177±1.032 | 7.216±1.197 | 1.027 | 0.793        | 226.294±224.122   | 98.075 ± 61.211   | 0.433 | <b>0.005</b> |
| SLC44A4  | 4.871±0.432 | 5.022±0.391 | 1.110 | <b>0.005</b> | 74.635 ± 63.501   | 31.991 ± 29.918   | 0.429 | <b>0.002</b> |
| SLC45A2  | 4.668±0.710 | 4.670±0.617 | 1.001 | 0.971        | 47.383 ± 38.847   | 54.468 ± 42.921   | 1.150 | 0.512        |
| SLC47A1  | <i>NA</i>   | <i>NA</i>   |       |              | 457.591±799.829   | 381.792±501.428   | 0.834 | 0.764        |
| SLC02A1  | 5.204±1.254 | 5.366±1.231 | 1.119 | 0.485        | 84.641 ± 34.394   | 69.864 ± 28.153   | 0.825 | 0.218        |
| SLC04C1  | 5.899±0.847 | 5.516±0.668 | 0.767 | <b>0.006</b> | 172.335±422.757   | 68.089 ± 80.720   | 0.395 | 0.205        |
| SLC05A1  | 4.327±0.454 | 4.525±0.443 | 1.147 | <b>0.019</b> | 15.132 ± 10.026   | 19.733 ± 16.113   | 1.304 | 0.361        |

\*P t test, two side. p<0.05 were indicated as bold type
